# Supplementary material for: Structural insight into molecular mechanism of poly(ethylene terephthalate) degradation
Source: PubMed Central journal article supplement (PMC5785972; doi:10.1038/s41467-018-02881-1), 2018-01-26
Supplement: 41467_2018_2881_MOESM1_ESM.pdf [file 41467_2018_2881_MOESM1_ESM.pdf]

## Supplementary information

# **Structural insight into molecular mechanism of poly(ethylene terephthalate) degradation**

Seongjoon Joo, In Jin Cho, Hogyun Seo, Hyeoncheol Francis Son, Hye-Young Sagong, Tae Joo Shin, So Young Choi, Sang Yup Lee\* & Kyung-Jin Kim\*

\*Correspondence should be addressed to: Email: [kkim@knu.ac.kr](mailto:kkim@knu.ac.kr)  
[leesy@kaist.ac.kr](mailto:leesy@kaist.ac.kr)

This PDF file includes:

Supplementary Figures 1 to 6.

Supplementary Tables 1 and 2

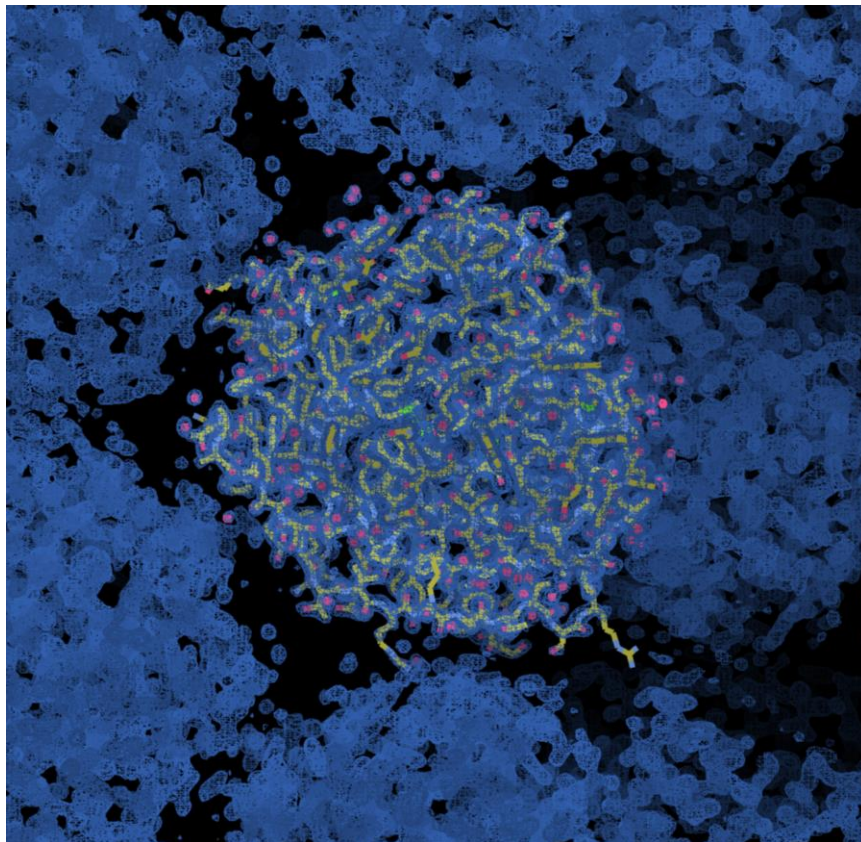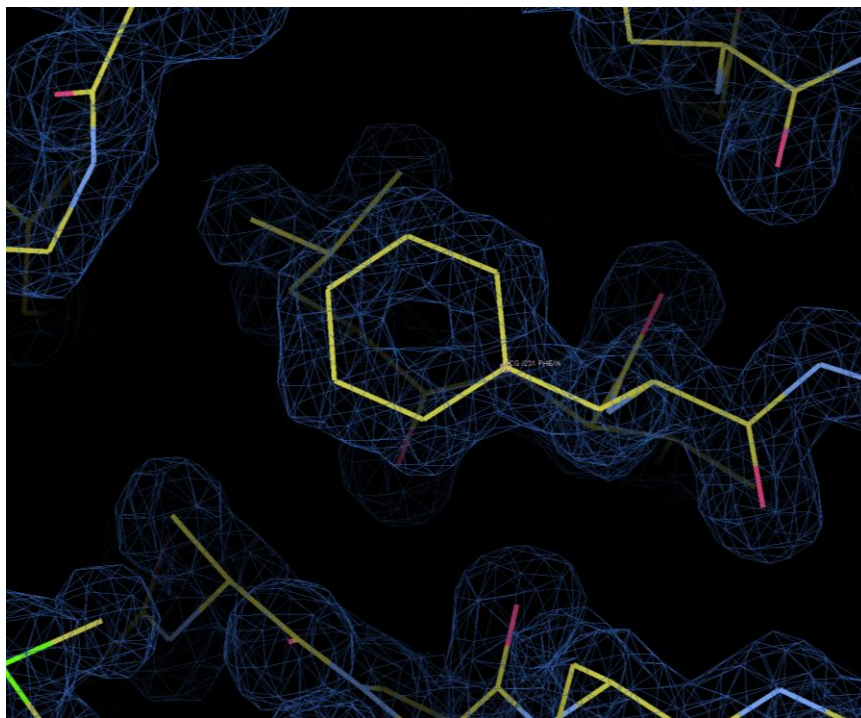

**Supplementary Figure 1.** The electron density map of *IsPETase*. The figures were generated by *WinCoot*. The  $2F_0 - F_c$  map contoured at  $1.5 \sigma$  is shown as blue mesh. The refined atomic model of *IsPETase* are shown as line with different color scheme by atoms; yellow-carbon, red-oxygen, blue-nitrogen, and green-sulfur. No crystallographic symmetry intimates the monomeric structure of *IsPETase* (above). The map represents the high resolution of  $1.5 \text{ \AA}$  of *IsPETase* (below).

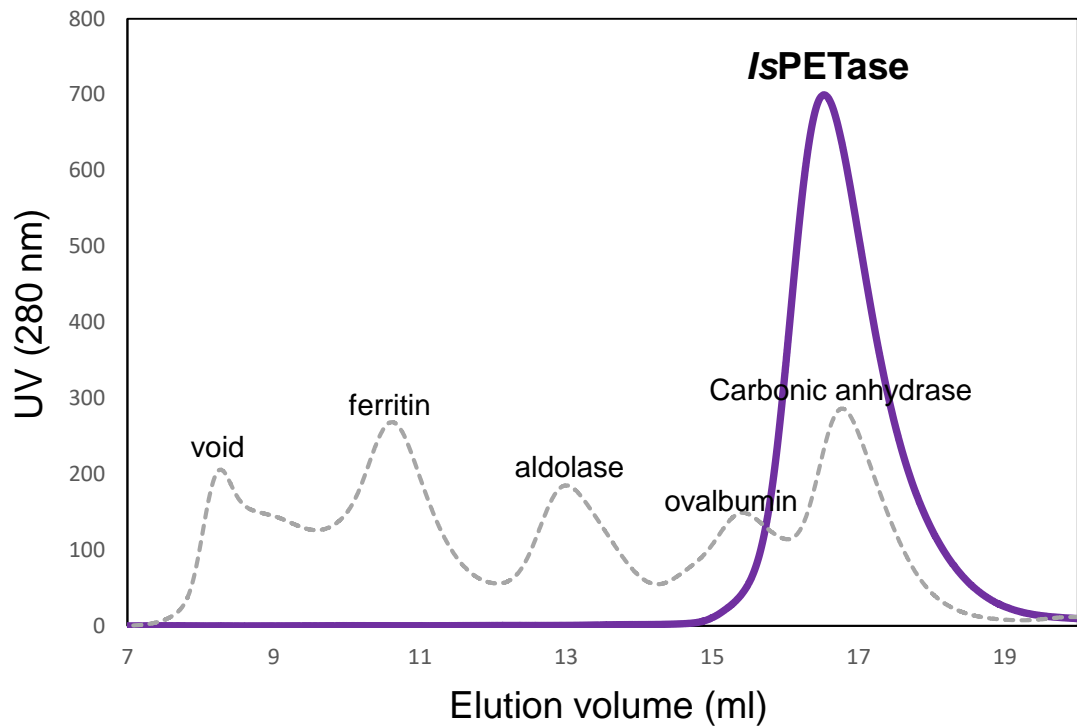

**Supplementary Figure 2.** Size-exclusion chromatographic analysis of *IsPETase*. A elution pick corresponding to a monomeric state of *IsPETase* in Size-exclusion chromatographic analysis. For precise analysis of the molecular weight, standard samples of ferritin (440kDa), aldolase (158kDa), ovalbumin (44kDa), and carbonic anhydrase (29kDa) are used for calibration and labelled.

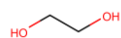

**EG**

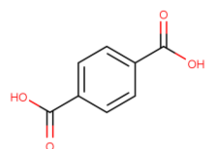

**TPA**

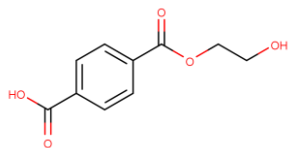

**MHET**

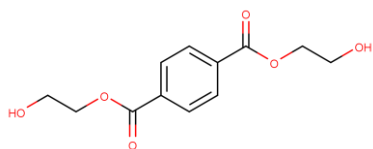

**BHET**

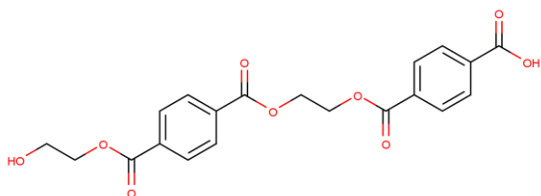

**(MHET)<sub>2</sub>**

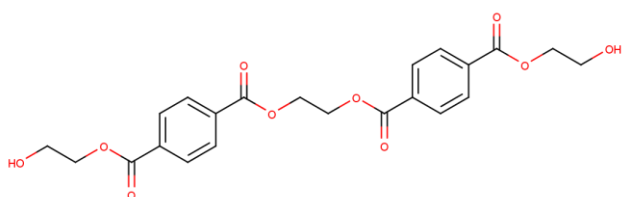

**2-HE(MHET)<sub>2</sub>**

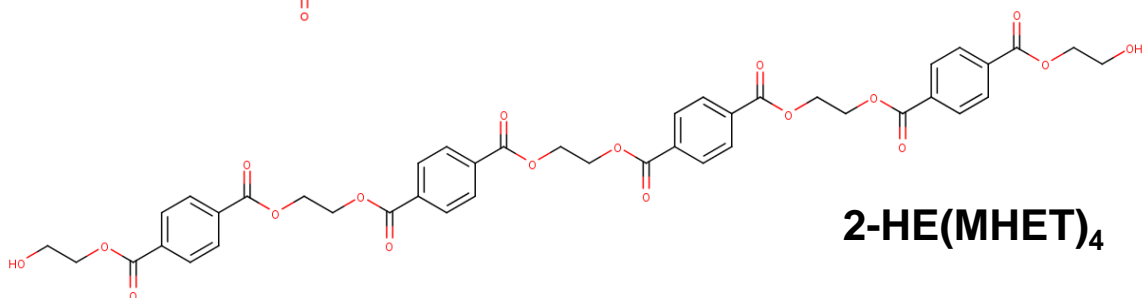

**2-HE(MHET)<sub>4</sub>**

**Supplementary Figure 3.** Chemical structures of the PET-related molecules used in this study.

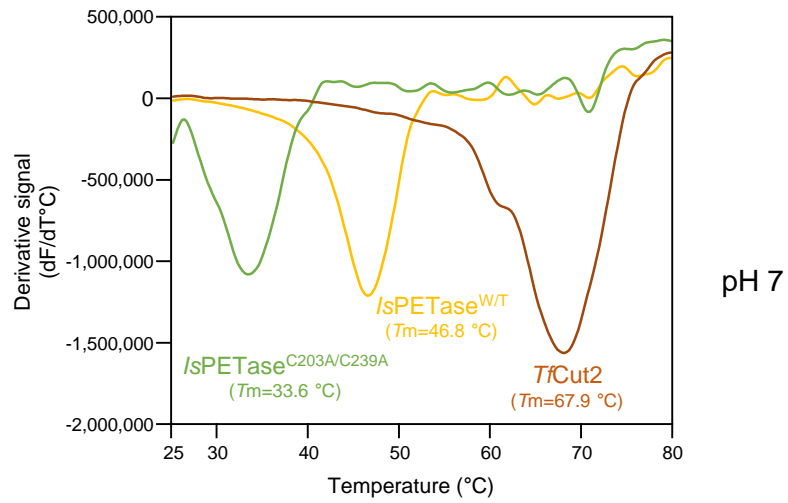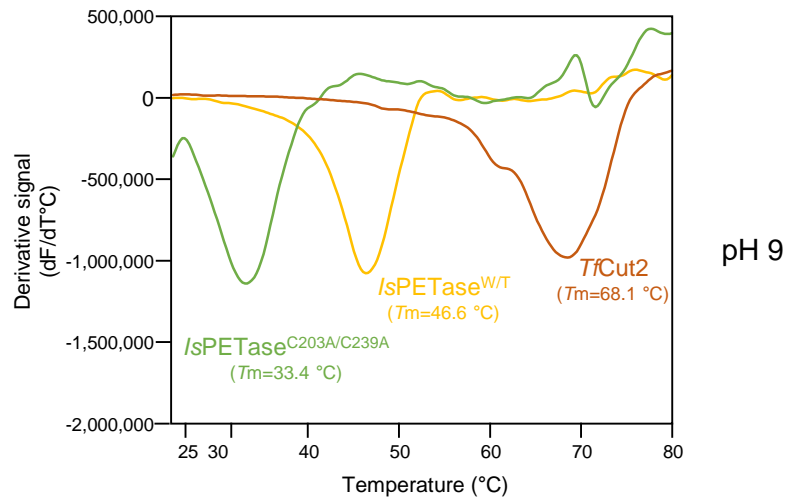

**Supplementary Figure 4.** Thermal stability measurements of *IsPETase*<sup>W/T</sup>, *IsPETase*<sup>C203A/C239A</sup>, and *TfCut2*. The  $T_m$  values at pH 7 and 9 of *IsPETase*<sup>W/T</sup>, *IsPETase*<sup>C203A/C239A</sup>, and *TfCut2* are displayed.

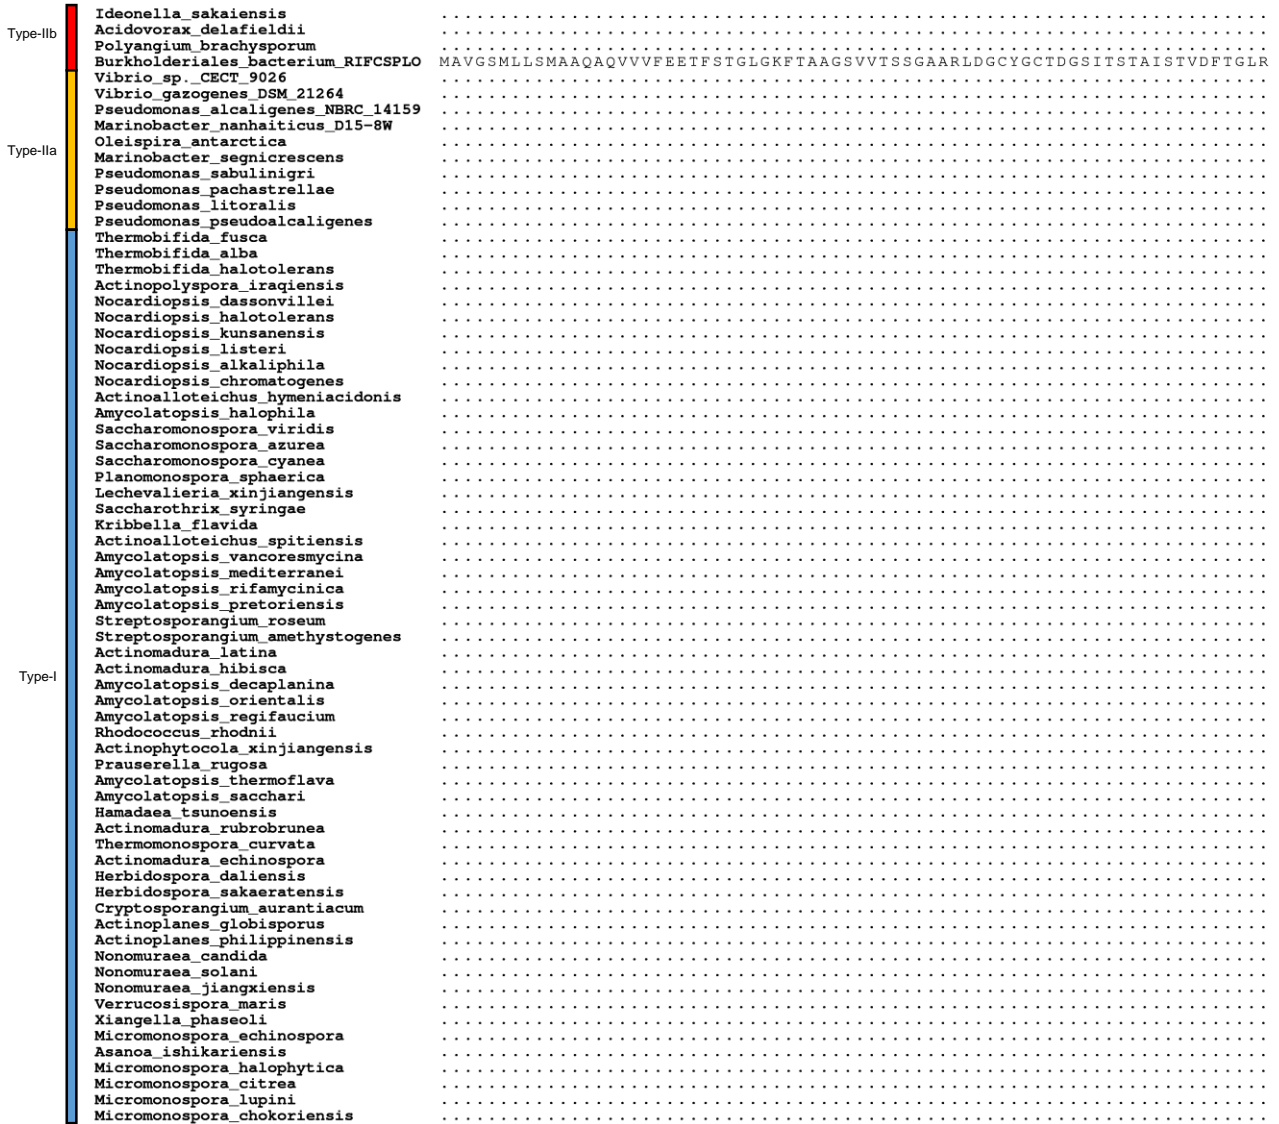

**Supplementary Figure 5.** Amino acid sequence alignment of PET-degrading enzymes. All enzymes involved in the tree generation in Fig. 6a were aligned. Key residues involved in the enzyme catalysis and the constitution of subsite I and subsite II are indicated by red-, blue-, and purple-colored triangles, respectively as same in Fig. 1a. At the left side, types of each enzymes are indicated.



|          | 1                                                                       | 10 |
|----------|-------------------------------------------------------------------------|----|
| Type-IIb | .....MNFPPRA.....SR.....LMQA                                            |    |
|          | .....MHLPRSRWDIP..FKEE..TTMT....HH.FSVRA                                |    |
|          | .....MP.....VLP.....RR.LAAAA                                            |    |
|          | LSFDRVTSGLDSSGEAGIAEFPSTNGSTYTAVESIRTASGRVTFNLP..TSAENQSGLR....LR.FRINA |    |
|          | .....M.....NVLTKCKL.....A.LGIIV                                         |    |
|          | .....M.....NVLTKCKL.....A.LGIIV                                         |    |
|          | .....M.....NKLQKPL.....T.L....                                          |    |
| Type-IIa | .....MS..DHYASNPLR....SV.VAAAS                                          |    |
|          | .....MI..NNKQKSTLV....TL.LASSA                                          |    |
|          | .....MPFNKKSVL....AL.WGAGA                                              |    |
|          | .....MI..NKNLPSSL....SM.LAAGA                                           |    |
|          | .....MI..NRTLPSLL....SM.LAAGA                                           |    |
|          | .....MAV.M.....TPRR.ERSLLSRALQVTA                                       |    |
|          | .....MSV.T.....TPRR.EA.SLLSRVAVAAA                                      |    |
|          | .....MRT...RVKSGTA..ARGRFTRAL....GVVTA.AL                               |    |
|          | .....MRT.YPLSPEE....TDGARSGPRS.RVRFARAGM                                |    |
|          | .....MRK.YPLSPSPETP..DSHRARRGPRS.RVSRFAARVGM                            |    |
|          | MRT...TSLPPS....QSHDTLRRS.WTRFASRTAA                                    |    |
|          | .....MTE.NP..PSEEG....RTRPRTARRS.WMSGLAAKSAL                            |    |
|          | MRTD.SPPSPIPAE....RTRSGSRARRS.WMSAVAVKSAL                               |    |
|          | .....MSI.ETIP.....HTGGARWA..RAAGTLAATA                                  |    |
|          | .....MASRRA....RVRSGRFRPT.RLAGLVLLALTM                                  |    |
|          | .....M.....MLFA.TL                                                      |    |
|          | .....MRI...RRQAGTG..ARASMARAI....GVMTT.AL                               |    |
|          | .....M.....MARTI....GVLTA.AL                                            |    |
|          | .....MRI...RSRSLTR..PHGRVSRTI....GVLTA.AL                               |    |
|          | .....M.....NHRA....RTLTKLAL                                             |    |
|          | .....MSLRSPLSR.H..ALVFA...                                              |    |
|          | .....MSSRSPLSR.R..ALVLV...                                              |    |
|          | .....MLGL.V..TTVFA...                                                   |    |
|          | .....MRS.TLSRPA...P..SRSLRRVLT.S..A..ALTGL...                           |    |
|          | .....MSA.LTSPPTLGLG..EKISRRRPWRT.KAAGVVLA...                            |    |
|          | .....MSA.LTSQPTSSGSS..EKIPRLRGWRA.KAAGVVLA...                           |    |
|          | .....MSA.LTSPPTTSGPS..EKISRRRGWRG.KAAGVVLA...                           |    |
|          | .....MSV.LTSPPTSSGSG..EKISRRRPWRA.KAAGVLA...                            |    |
|          | .....MTLAL                                                              |    |
|          | .....MTLALAL                                                            |    |
|          | .....MHLIPR..RAAKTLALAL                                                 |    |
| Type-I   | .....MPHRTTPSGSP..PPARPGRPR..RGPRRARAVAA                                |    |
|          | .....MCS.....TAN....MRSTTR..ILCGLATVAA                                  |    |
|          | .....MRSTTR..ILCGLATVAA                                                 |    |
|          | .....MRSTTR..ILCGLATVAA                                                 |    |
|          | .....MRRGVR..ILTLTIAAS                                                  |    |
|          | .....MRKTLRKGVR..ILGGVALAAT                                             |    |
|          | .....MTLLSAAAL                                                          |    |
|          | .....MRRSPR..NLARLVTALA                                                 |    |
|          | .....MRRSAK..AWSSLVFAA                                                  |    |
|          | .....MHTSTKA..GAARVLAALAV                                               |    |
|          | .....MRSG.LST....A..PR...RRALR..AVATTALALTL                             |    |
|          | .....MKRT.L.....KRALS....LLPA.AA                                        |    |
|          | .....MNTN.L.....ARKLR....TLPALLA                                        |    |
|          | .....MSRLAT..TALAF                                                      |    |
|          | .....MRPHFWSRRLSRIAT..AALAF                                             |    |
|          | .....MLTIKPKARRLGLIGK..LTAL                                             |    |
|          | .....MTTK...TRR..FLAA..AAA...                                           |    |
|          | .....VPTARR..WLVV..AATAI                                                |    |
|          | .....MSREYDDVQL...PTPRSGAR..TLTK..LALTV                                 |    |
|          | .....MQL...STPHGA...LTK..LTLT                                           |    |
|          | .....MQL...STPQGAR..TLTK..LTTL                                          |    |
|          | .....MTA                                                                |    |
|          | .....MRSPTTTRPRSVS....LVAR..LAMAA                                       |    |
|          | .....MPSPTTIRPRSLVR..AVAG..LTTAV                                        |    |
|          | .....MKTAIR..L...LATA                                                   |    |
|          | .....MRSPTTTRPRSAVR..TMAR..LAMAA                                        |    |
|          | .....MSI.CPDPQGVDPVSSPTTTRPRSAVR..AA.G..LALAA                           |    |
|          | .....MPAR....AVR..LALAA                                                 |    |
|          | .....MSSPTTTRPRSV....AAR..LGLSA                                         |    |

**Supplementary Figure 5.** Amino acid sequence alignment of PET-degrading enzymes (continued).

|                                         |                                           | 20                      | 30                      | 40           | 50                  | 60                |                 |
|-----------------------------------------|-------------------------------------------|-------------------------|-------------------------|--------------|---------------------|-------------------|-----------------|
| Type-IIb                                | <i>Ideonella sakaiensis</i>               | AVLGG.....              | GLMAYVSAATAQIT          | NPYARGP      | NP                  | TAAASLEASAGPFTVRS |                 |
|                                         | <i>Acidovorax delafieldii</i>             | LLAA.....               | GALLASAAVSAQIT          | NPYERGP      | NP                  | TSSLEASRGPFYSQST  |                 |
|                                         | <i>Polyangium brachysporum</i>            | LLASA.....              | TLVPLSAAQIT             | NPYQKGP      | NP                  | TRDLEASRGPFYAST   |                 |
|                                         | <i>Burkholderiales bacterium_RIFCSPL0</i> | SLSSSEYTVVDN            | IRLEGTSGSGGGT           | NPFEKGP      | NP                  | KTMLEASGPFYKTT    |                 |
|                                         | <i>Vibrio sp. CECT_9026</i>               | IFFSLPSFAV....          | P.CSD.....              | CNNGFERGP    | NP                  | VRVDQLEASRGPFYKTT |                 |
|                                         | <i>Vibrio zarogones DSM_21264</i>         | AFSSLPSFAV....          | P.CSD.....              | CNNGFERGP    | NP                  | VRVDQLEASRGPFYKTT |                 |
|                                         | <i>Pseudomonas alcaligenes NBRC_14159</i> | .....                   | .....                   | .....        | .....               | .....             |                 |
|                                         | <i>Marinobacter nanhaiticus D15-8W</i>    | .....                   | .....                   | .....        | .....               | .....             |                 |
|                                         | <i>Oleispira antarctica</i>               | .....                   | .....                   | .....        | .....               | .....             |                 |
|                                         | <i>Marinobacter segnicrescens</i>         | LLFSASVFAAG....         | GGGSDGGDDGCTSN          | CYGERGP      | NP                  | TESLEASGPFYSVTR   |                 |
| Type-IIa                                | <i>Pseudomonas sabulinigri</i>            | LLMSSVAMANN....         | PPVDPG....              | TGEYQKGP     | NP                  | TVSLEASRGPFYSVTR  |                 |
|                                         | <i>Pseudomonas pachastrellae</i>          | LLFMSALANN....          | PAPTDPDGG....           | GSAVQKGP     | NP                  | SVSLEASRGPFYSVTR  |                 |
|                                         | <i>Pseudomonas litoralis</i>              | LMLSTSAFATN....         | PPVDDPSD....            | GGAYERGP     | NP                  | TVSLEASGPFYSVTR   |                 |
|                                         | <i>Pseudomonas pseudocalcigenes</i>       | LLLSTSVMATN....         | PPVDETPD....            | GDSYARGP     | NP                  | VAFLEASGPFYSVTR   |                 |
|                                         | <i>Thermobifida fusca</i>                 | .....                   | AATALVTAVSLAAPAHAA      | NPYERGP      | NP                  | TDALLEASGPFYSVEE  |                 |
|                                         | <i>Thermobifida alba</i>                  | .....                   | AATVALAAPAQAAN          | NPYERGP      | NP                  | TESMLEASGPFYSVEE  |                 |
|                                         | <i>Thermobifida halotolerans</i>          | .....                   | .....                   | MANPYERGP    | NP                  | TNSIEALRGPFYVDE   |                 |
|                                         | <i>Actinopolyspora iraqiensis</i>         | ALTG.....               | GVAGAGVASAQGN           | NPYERGP      | NP                  | EDSIEDRGPFYVDE    |                 |
|                                         | <i>Nocardioopsis dassonvillei</i>         | .....                   | TLALT...AGLTGAVVAPAQAAN | NPYERGP      | NP                  | TESVTVAVEGYVDE    |                 |
|                                         | <i>Nocardioopsis halotolerans</i>         | .....                   | TLTLA...AGLTGGVVAQAAN   | NPYERGP      | NP                  | EQSVTALRGYFDTD    |                 |
| Type-I                                  | <i>Nocardioopsis kunsanensis</i>          | .....                   | VIGAA...AVTTVGLTPVPHAE  | NPHERGP      | NP                  | TEESVTAFTGFFDTD   |                 |
|                                         | <i>Nocardioopsis listeri</i>              | .....                   | VFGLS...LIGAGATVPALAE   | NPHERGP      | NP                  | TESVTVARHGFDTD    |                 |
|                                         | <i>Nocardioopsis alkaliphila</i>          | .....                   | VVGLA...LFTGGATVAPAAAS  | NPYERGP      | NP                  | TERSVTARHGFDTD    |                 |
|                                         | <i>Nocardioopsis chromatogenes</i>        | .....                   | LALGGGTVAASS...A        | HAAPLPAAQAAN | NPHERGP             | NP                | EDSIEALRGHFDVAE |
|                                         | <i>Actinalloteichus hymeniacidonisi</i>   | VA.....                 | .....                   | .....        | .....               | .....             |                 |
|                                         | <i>Amycolatopsis halophila</i>            | .....                   | LL...VGTPTAATGVATAQD    | NPYERGP      | NP                  | TESMIEALRGPFYVAT  |                 |
|                                         | <i>Saccharomonospora viridis</i>          | AVLVG...AV....          | GGVACAESTVAQD           | NPYERGP      | NP                  | EDSIEALRGPFYVAT   |                 |
|                                         | <i>Saccharomonospora azurea</i>           | AVASG...LV....          | SAGVACADVITTEQ          | NPYERGP      | NP                  | EDSIEALRGPFYVAT   |                 |
|                                         | <i>Saccharomonospora cyanea</i>           | AVASG...LA....          | SAGVACADEVITTAQ         | NPYERGP      | NP                  | TEGSEALRGPFYVAT   |                 |
|                                         | <i>Planomonospora sphaerica</i>           | .....                   | ALALVGGAGVAPAAHAAA      | GYERGP       | NP                  | TSSLEASRGPFYVAT   |                 |
| <i>Lechevalieria xinjiangensis</i>      | .....                                     | AV...VALTSSGSIAPAAE     | NPYERGP                 | NP           | ATASIEALRGPFYVAT    |                   |                 |
| <i>Saccharothrix syringae</i>           | .....                                     | AA...VALTTPTAVAAQAE     | NPYERGP                 | NP           | ATSSIEALRGPFYVAT    |                   |                 |
| <i>Kribbella flavida</i>                | .....                                     | LT...LFTGGATVAPAAAS     | NPYERGP                 | NP           | TESMIEALRGPFYVAT    |                   |                 |
| <i>Actinalloteichus spitiensis</i>      | .....                                     | LV...AGSLAAPAAQAAN      | NPYERGP                 | NP           | TERSIEALRGPFYVAT    |                   |                 |
| <i>Amycolatopsis vancouveri</i>         | .....                                     | AL...LFTGGATVAPAAAS     | NPYERGP                 | NP           | TESMIEALRGPFYVAT    |                   |                 |
| <i>Amycolatopsis mediterranea</i>       | .....                                     | AL...ALTTGVAAPAPAAA     | NPYERGP                 | NP           | TESMIEALRGPFYVAT    |                   |                 |
| <i>Amycolatopsis rifamycinica</i>       | .....                                     | AL...AVTTAVAAPAAE       | NPYERGP                 | NP           | TESMIEALRGPFYVAT    |                   |                 |
| <i>Amycolatopsis pretoriensis</i>       | .....                                     | AL...VVTITLASPAPAA      | NPYERGP                 | NP           | TESMIEALRGPFYVAT    |                   |                 |
| <i>Streptosporangium roseum</i>         | VLGGALAPAA...HA                           | ATFTAPAAQVAAN           | NPYERGP                 | NP           | TVSIEALRGPFYVAT     |                   |                 |
| <i>Streptosporangium amethystogenes</i> | LGTGGGLAPAA...Q                           | AVAAP...AAQAAAAG        | PYDRGP                  | NP           | TNASIEALRGPFYVAT    |                   |                 |
| <i>Actinomadura latina</i>              | .....                                     | T...ATALAVPQAAQAAN      | NPYERGP                 | NP           | APESERSIEALRGPFYVAT |                   |                 |
| <i>Actinomadura hibisca</i>             | LSLG.....                                 | AALLTAAPVQAAA           | NPYERGP                 | NP           | TEASIEALRGPFYVAT    |                   |                 |
| <i>Amycolatopsis decaplanina</i>        | .....                                     | L...T...VAPTAYAAE       | NPYERGP                 | NP           | TESMIEALRGPFYVAT    |                   |                 |
| <i>Amycolatopsis orientalis</i>         | .....                                     | L...T...VAPTAYAAE       | NPYERGP                 | NP           | TESMIEALRGPFYVAT    |                   |                 |
| <i>Amycolatopsis regifaucium</i>        | .....                                     | L...A...IAPTAAHAD       | NPYERGP                 | NP           | TESMIEALRGPFYVAT    |                   |                 |
| <i>Rhodococcus rhodnii</i>              | .....                                     | VA...AG...VPATALGAE     | NPYERGP                 | NP           | TESMIEALRGPFYVAT    |                   |                 |
| <i>Actinophytocola xinjiangensis</i>    | .....                                     | V...L...VAG...TATAATAQD | NPYERGP                 | NP           | TESMIEALRGPFYVAT    |                   |                 |
| <i>Prauserella rugosa</i>               | A.....                                    | LV...TAVAGPTTALAQDAS    | PYQHGP                  | NP           | EDSIEALRGPFYVAT     |                   |                 |
| <i>Amycolatopsis thermoflava</i>        | .....                                     | L...LA...AGAATATASAQAAN | NPYERGP                 | NP           | TESMIEALRGPFYVAT    |                   |                 |
| <i>Amycolatopsis sacchari</i>           | .....                                     | MA...V...TLAANPAEAS     | PYQHGP                  | NP           | TESMIEALRGPFYVAT    |                   |                 |
| <i>Hamadaea tsunoensis</i>              | .....                                     | M...LTGVLAAGSPAADV      | NPYERGP                 | NP           | ETLASIQAGPFYVAT     |                   |                 |
| <i>Actinomadura rubrobrunea</i>         | .....                                     | TAGTGVLAAPAAAGA         | PAAPAAAAAAV             | NPYQHGP      | NP                  | EDLIEALRGPFYVAT   |                 |
| <i>Thermomonospora curvata</i>          | .....                                     | LAASA.....              | LVAASPAQAAA             | NPYQKGP      | NP                  | ETASITAAARGPFYVAT |                 |
| <i>Actinomadura echinospora</i>         | .....                                     | LAGSA.....              | IIVAAPAANAAA            | NPYERGP      | NP                  | TESMIEALRGPFYVAT  |                 |
| <i>Herbidosporea daliensis</i>          | ILATGTAVTL....                            | .....                   | APSAHAA                 | GFERGP       | NP                  | TSSIEALRGPFYVAT   |                 |
| <i>Herbidosporea sakaeratsensis</i>     | TLATGTAVTL....                            | .....                   | APSAHAA                 | GFERGP       | NP                  | TSSIEALRGPFYVAT   |                 |
| <i>Cryptosporangium aurantiacum</i>     | ALAGGSIAAAPS....                          | .....                   | GVQAAD                  | GPYWRGP      | NP                  | ETASVATTGPFYVAT   |                 |
| <i>Actinoplanes globisporus</i>         | .....                                     | AAVLTV...PATSAHAAD      | NPYQKGP                 | NP           | TLAALDASRGPFYVAT    |                   |                 |
| <i>Actinoplanes philippinensis</i>      | TLVT...GAGVT....                          | .....                   | PAAAAAN                 | NPYERGP      | NP                  | ETLAAQASRGPFYVAT  |                 |
| <i>Nonomuraea candida</i>               | SLIAGALAAATSPAQ....                       | .....                   | AAAGPYDRGP              | NP           | ETDAIEALRGPFYVAT    |                   |                 |
| <i>Nonomuraea solani</i>                | LLIGGTLTPASPAQAAD                         | PPYDSASLTAAG            | NPYDRGP                 | NP           | ETNAIEALRGPFYVAT    |                   |                 |
| <i>Nonomuraea jiangxiensis</i>          | ALIGGALAAAPAAQ....                        | .....                   | AAAGPYDRGP              | NP           | ETNAIEALRGPFYVAT    |                   |                 |
| <i>Verrucosipora maris</i>              | VLAAGGVVATSS....                          | .....                   | AAQAAN                  | NPYERGP      | NP                  | ETNAIEALRGPFYVAT  |                 |
| <i>Xiangella phaseoli</i>               | VLATGGVVATSS....                          | .....                   | PAQAAN                  | NPYERGP      | NP                  | ETNAIEALRGPFYVAT  |                 |
| <i>Micromonospora echinospora</i>       | LLATGGVLAAS....                           | .....                   | GAQAAN                  | NPYERGP      | NP                  | ETNAIEALRGPFYVAT  |                 |
| <i>Asanoa ishikariensis</i>             | AAVLAVGVAGVP....                          | .....                   | NALAAD                  | NPYERGP      | NP                  | ETTSILDAIRGPFYVAT |                 |
| <i>Micromonospora halophytica</i>       | VLAAGGVVATSS....                          | .....                   | GVQAAN                  | NPYERGP      | NP                  | ETSAIEALRGPFYVAT  |                 |
| <i>Micromonospora citrea</i>            | ALAATAALAAP....                           | .....                   | AAASAD                  | NPYERGP      | NP                  | ETVALLEALRGPFYVAT |                 |
| <i>Micromonospora lupini</i>            | TLLAAGVLTGPA....                          | .....                   | PAQAAN                  | NPYERGP      | NP                  | ETTAIEALRGPFYVAT  |                 |
| <i>Micromonospora chokoriensis</i>      | ALVAGVVLAGPS....                          | .....                   | GAAQAAG                 | PYERGP       | NP                  | ETTAIEALRGPFYVAT  |                 |

Supplementary Figure 5. Amino acid sequence alignment of PET-degrading enzymes (continued).



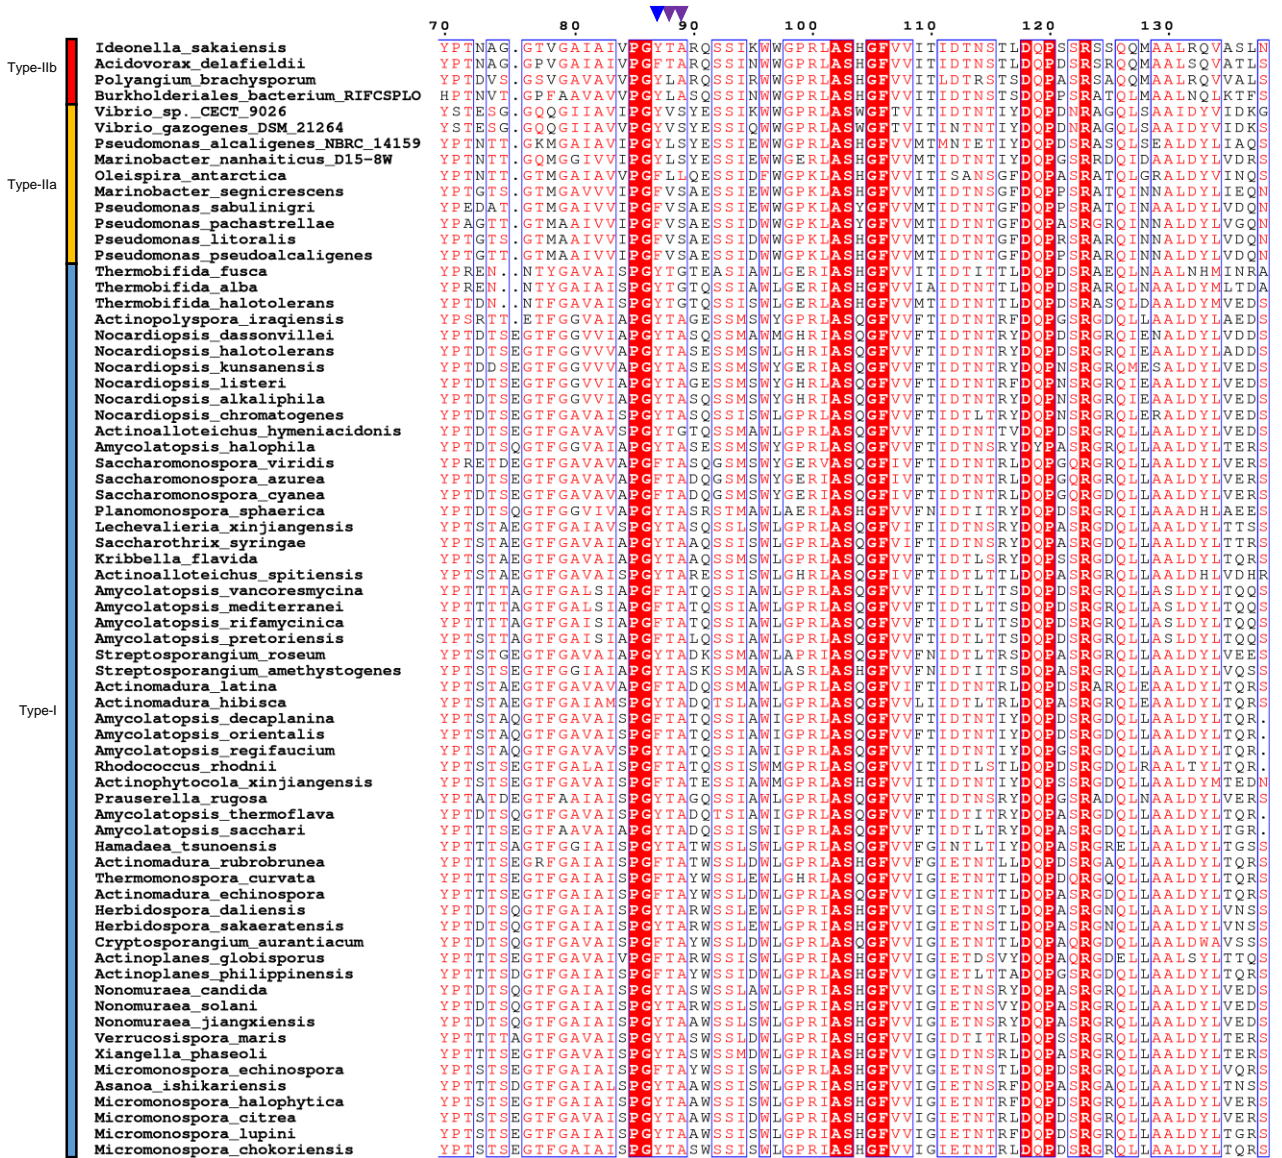

**Supplementary Figure 5.** Amino acid sequence alignment of PET-degrading enzymes (continued).





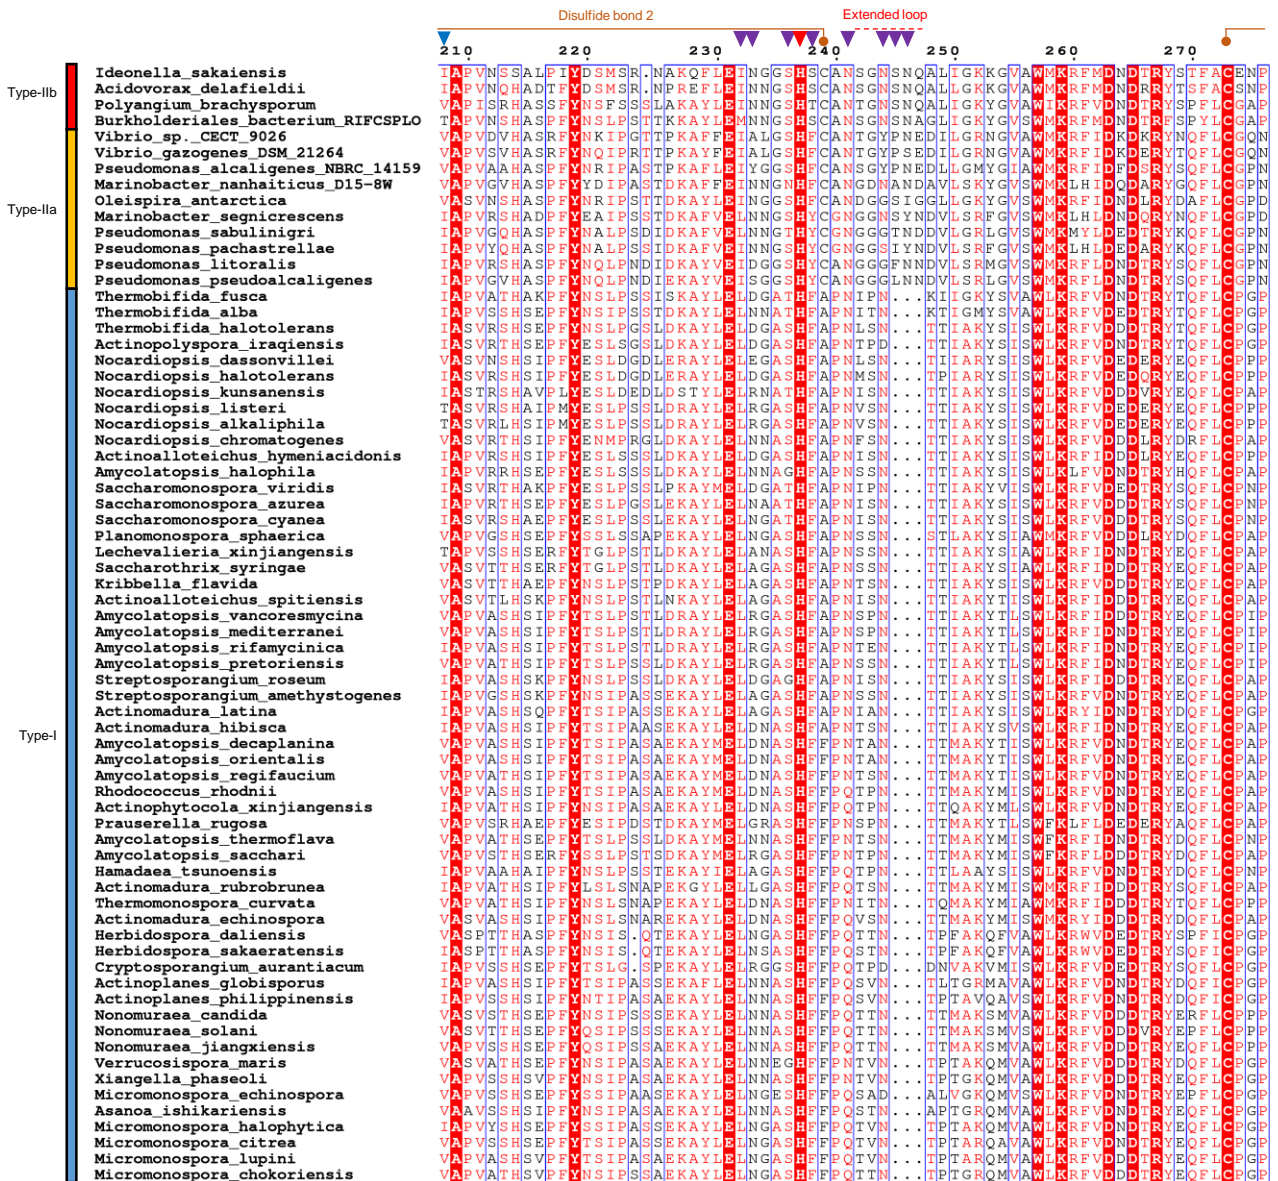

Supplementary Figure 5. Amino acid sequence alignment of PET-degrading enzymes (continued).

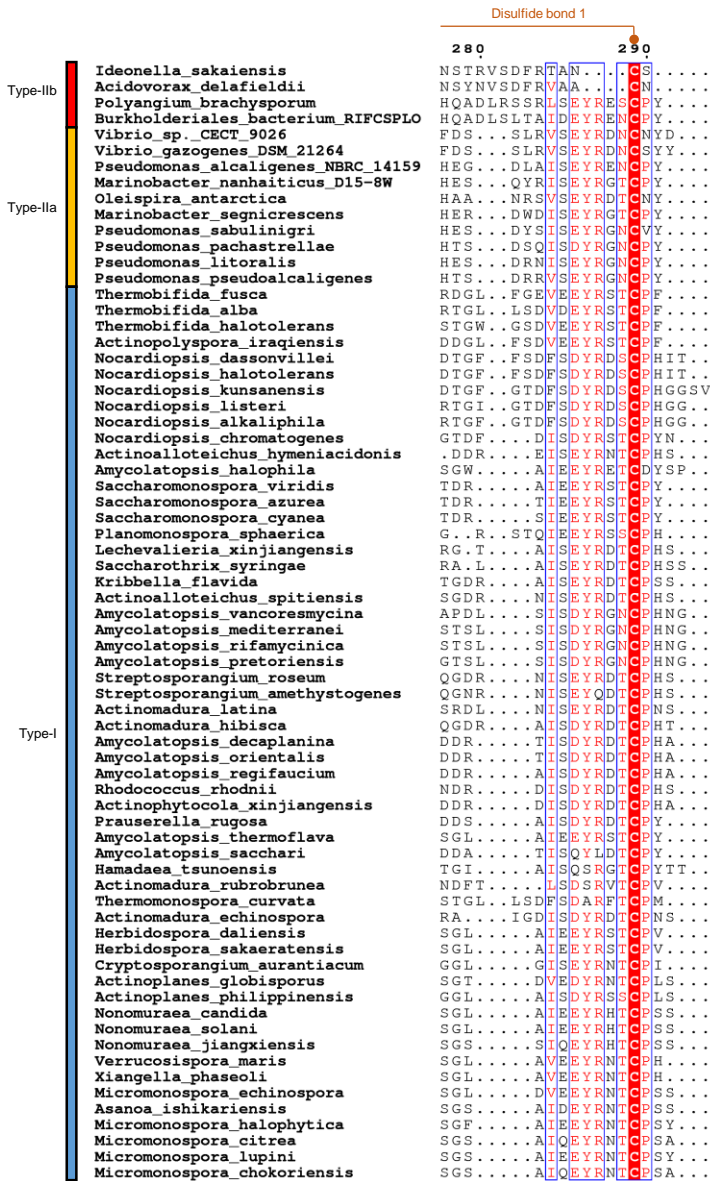

Supplementary Figure 5. Amino acid sequence alignment of PET-degrading enzymes.

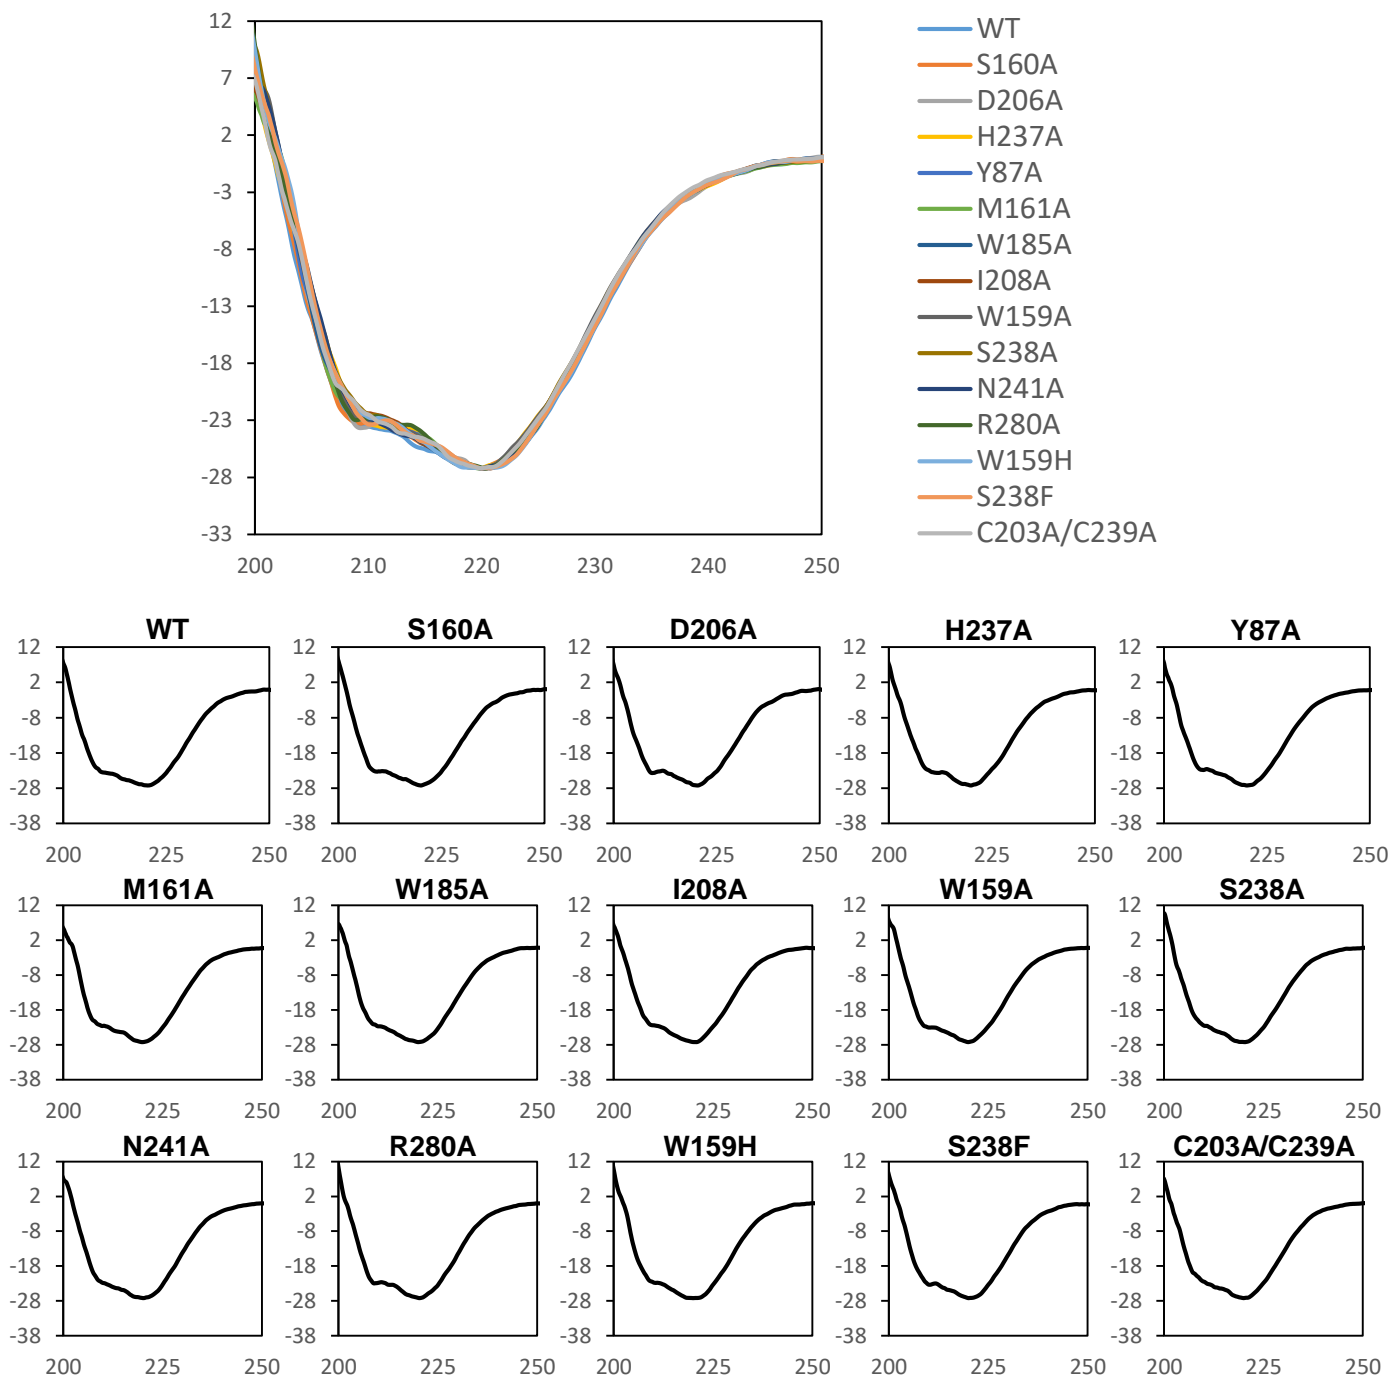

**Supplementary Figure 6.** Far-UV Circular dichroism. Above figure includes superposed CD spectra of the *IsPETase* variants used in this study. Each spectrum of the variants is also shown in below. The spectra indicate that there are no significant difference among the variants and *IsPETase*<sup>WT</sup>.



|                                                                | <i>Is</i> PETase                                      | <i>Is</i> PETase <sup>R280A</sup>                     |
|----------------------------------------------------------------|-------------------------------------------------------|-------------------------------------------------------|
| <b>PDB code</b>                                                | 5XJH                                                  | 5YNS                                                  |
| <b>Data collection</b>                                         |                                                       |                                                       |
| Wavelength (Å)                                                 | 0.97934                                               | 0.97934                                               |
| Unit cell ( <i>a</i> , <i>b</i> , <i>c</i> ; $\gamma$ ) (Å; °) | 43.48, 50.40, 129.49; 90.0                            | 43.61, 50.59, 129.58; 90.0                            |
| Space group                                                    | <i>P</i> 2 <sub>1</sub> 2 <sub>1</sub> 2 <sub>1</sub> | <i>P</i> 2 <sub>1</sub> 2 <sub>1</sub> 2 <sub>1</sub> |
| Solvent content (%)                                            | 53.38                                                 | 52.66                                                 |
| Protein chains in AU                                           | 1                                                     | 1                                                     |
| Resolution range (Å)                                           | 50.00-1.55                                            | 50.00-1.36                                            |
| Highest resolution shell (Å)                                   | 1.58-1.55                                             | 1.38-1.36                                             |
| Unique reflections                                             | 42939                                                 | 62434                                                 |
| Redundancy                                                     | 6.5(5.9)                                              | 9.3(5.7)                                              |
| Completeness (%)                                               | 99.9(99.9)                                            | 98.7(96.9)                                            |
| <i>R</i> <sub>merge</sub> (%)                                  | 6.8(29.8)                                             | 6.7(30.1)                                             |
| Average <i>I</i> / $\sigma$ ( <i>I</i> )                       | 31.4(5.2)                                             | 40.8(4.6)                                             |
| B from Wilson plot (Å <sup>2</sup> )                           | 14.2                                                  | 10.8                                                  |
| <b>Refinement</b>                                              |                                                       |                                                       |
| <i>R</i> (%)                                                   | 15.9                                                  | 16.6                                                  |
| <i>R</i> <sub>free</sub> (%)                                   | 19.2                                                  | 19.2                                                  |
| Mean B value (Å <sup>2</sup> )*                                | 16.1                                                  | 15.0                                                  |
| RMS deviation bond lengths (Å)                                 | 0.026                                                 | 0.025                                                 |
| RMS deviation bond angles (°)                                  | 2.286                                                 | 2.249                                                 |
| Number of amino acid residues                                  | 272                                                   | 264                                                   |
| Number of water molecules                                      | 150                                                   | 294                                                   |
| <b>Ramachandran plot</b>                                       |                                                       |                                                       |
| Most favored regions (%)                                       | 97.3                                                  | 97.6                                                  |
| Additional allowed Regions (%)                                 | 2.7                                                   | 2.4                                                   |

\*Mean B value is for both protein atoms and the solvent molecules.

**Supplementary Table 1.** Data collection and refinement statistics of *Is*PETase.

|                                                                     |                                                                                                                                                                                                                                                                                                                                                                                                                                                                                                                                                                                                                                                                                                                                                                                                                                                                                            |
|---------------------------------------------------------------------|--------------------------------------------------------------------------------------------------------------------------------------------------------------------------------------------------------------------------------------------------------------------------------------------------------------------------------------------------------------------------------------------------------------------------------------------------------------------------------------------------------------------------------------------------------------------------------------------------------------------------------------------------------------------------------------------------------------------------------------------------------------------------------------------------------------------------------------------------------------------------------------------|
| Extra amino acids at N-terminus                                     | MGSSHHHHHSSGLVPRGSHM                                                                                                                                                                                                                                                                                                                                                                                                                                                                                                                                                                                                                                                                                                                                                                                                                                                                       |
| Codon optimized DNA sequence used for expression of <i>IsPETase</i> | CGCGGTCCGAATCCGACAGCCGCCAGTTTGGAAAG<br>CGAGCGCTGGTCCATTCACCGTTCGCTCCTTTACC<br>GTGAGTAGACCGAGCGGTTATGGCGCTGGCACCG<br>TTTACTATCCAACAAATGCTGGGGGTACCGTGGGC<br>GCCATAGCCATAGTTCCCGGGTATACGGCACGGCA<br>GTCATCAATTAATGGTGGGGACCGCGTCTGGCAT<br>CCCACGGTTTCGTAGTAATTACAATTGACACAAATT<br>CCACGTTAGACCAGCCATCAAGTCGGAGTTCGCAA<br>CAAATGGCCGCGCTGCGCCAGGTGGCGTCGTTAA<br>ACGGTACAAGTAGCAGCCCGATTTACGGAAAGGTC<br>GATACCGCTCGTATGGGTGTTATGGGGTGGAGTAT<br>GGGAGGTGGAGGCTCCCTGATCTCTGCTGCTAAC<br>AACCTTTCGCTGAAAGCAGCGGCGCCTCAAGCAC<br>CATGGGATTCTTCGACAAATTTTAGTTCTGTAAGTG<br>TGCCACGCTGATCTTCGCATGTGAAAACGATAGT<br>ATAGCCCCGGTCAACTCTTCAGCACTTCCTATCTAT<br>GATTCTATGTCACGCAACGCTAAGCAGTTTCTCGA<br>AATTAATGGTGGCTCACATTCCTGTGCGAATAGCG<br>GCAATTCTAACCAAGCATTAAATCGGAAAAAAGGC<br>GTTGCATGGATGAAACGTTTTATGGACAATGATACT<br>AGGTATTCTACTTTTGCCTGCGAGAACCCGAATAG<br>CACCAGAGTGTCTGATTTTCGTACAGCGAATTGCA<br>GC |
| Extra amino acids at C-terminus                                     | LEDPAANKARKEAELAAATAEQ                                                                                                                                                                                                                                                                                                                                                                                                                                                                                                                                                                                                                                                                                                                                                                                                                                                                     |

**Supplementary Table 2.** Codon-optimized DNA sequence used for expression of *IsPETase* and extra amino acids at the N- and the C-termini.
